# Supplementary material for: Arbuscular Mycorrhizal Fungi and Compost-Based Biostimulants Enhance Fitness, Physiological Responses, Yield, and Quality Traits of Drought-Stressed Tomato Plants
Source: MDPI journal article supplement (doi:10.3390/plants12091856), 2023-04-30
Supplement: s1 [file s1]

**Supplementary Table 1:** Result of multivariate analysis of variance (MANOVA) for independent variables, including AMF (A), Compost (C), conventional chemical fertilizers (NPK), and the interaction among them.

| Parameters                    | AMF (A) |         | C       |         | NPK     |         | Drought (D) |         | A x C    |         | A x D   |         | C x D   |         | NPK x D |         | A x C x D |         |
|-------------------------------|---------|---------|---------|---------|---------|---------|-------------|---------|----------|---------|---------|---------|---------|---------|---------|---------|-----------|---------|
|                               | F value | P value | F value | P value | F value | P value | F value     | P value | F value  | P value | F value | P value | F value | P value | F value | P value | F value   | P value |
| Mycorrhization frequency      | 1965.55 | ***     | 386.76  | ***     | 0.00    | ns      | 26.68       | ***     | 386.76   | ***     | 35.431  | ***     | 1.85    | ns      | 0.00    | ns      | 1.85      | ns      |
| Mycorrhization intensity      | 1028.17 | ***     | 938.11  | ***     | 0.00    | ns      | 37.68       | ***     | 938.11   | ***     | 50.04   | ***     | 44.105  | ***     | 0.00    | ns      | 44.10     | ***     |
| Shoot height                  | 3.59    | ns      | 1.56    | ns      | 5.73    | *       | 98.02       | ***     | 31.40    | ***     | 1.77    | ns      | 0.860   | ns      | 3.32    | ns      | 8.66      | ns      |
| Root length                   | 4.79    | ns      | 0.00    | ***     | 3.07    | ns      | 45.91       | ***     | 58.28    | ***     | 3.40    | ns      | 2.703   | ns      | 47.45   | ***     | 6.95      | ns      |
| Shoot dry matter              | 2.23    | ns      | 0.02    | ns      | 23.19   | ***     | 23.53       | ***     | 34.63    | ***     | 0.06    | ns      | 1.596   | ns      | 1.28    | ns      | 0.40      | ns      |
| Root dry matter               | 10.94   | **      | 14.07   | ***     | 216.74  | ***     | 67.32       | ***     | 30.58    | ***     | 0.27    | ns      | 0.208   | ns      | 0.00    | ns      | 6.95      | *       |
| Number of leaves              | 4.93    | *       | 40.5    | ***     | 15.83   | ***     | 28.78       | ***     | 33.35    | ***     | 4.93    | ns      | 1.075   | ns      | 2.14    | ns      | 1.77      | ns      |
| Number of flowers             | 5.00    | *       | 3.20    | ns      | 36.10   | ***     | 10.56       | *       | 16.20    | ***     | 3.20    | ns      | 5.000   | *       | 8.10    | **      | 0.80      | ns      |
| Number of fruits              | 3.12    | ns      | 1.12    | ns      | 9.00    | **      | 8.94        | ns      | 10.12    | *       | 1.12    | ns      | 0.125   | ns      | 4.00    | ns      | 0.12      | ns      |
| Fruit weight                  | 122.75  | ***     | 47.62   | ***     | 279.82  | ***     | 60.97       | ***     | 302.72   | ***     | 55.85   | ***     | 11.338  | **      | 21.48   | ***     | 0.14      | ns      |
| Yield fruit                   | 1908.13 | ***     | 372.09  | ***     | 3664.74 | ***     | 6447.21     | ***     | 7672.28  | ***     | 145.88  | ***     | 5.202   | *       | 1135.06 | ***     | 878.97    | ***     |
| Leaf water potential          | 3.63    | ns      | 0.90    | ns      | 0.11    | ns      | 54.296      | ***     | 20.51    | ***     | 0.90    | ns      | 0.227   | ns      | 2.84    | ns      | 6.87      | **      |
| Stomatal conductance          | 40.21   | ***     | 4.60    | *       | 147.19  | ***     | 524.69      | ***     | 213.83   | ***     | 8.23    | **      | 2.179   | ns      | 2.08    | ns      | 9.33      | **      |
| Fv/Fm                         | 2.81    | ns      | 0.25    | ns      | 10.68   | **      | 333.58      | ***     | 17.23    | ***     | 7.04    | *       | 2.292   | ns      | 10.99   | **      | 0.14      | ns      |
| Chlorophyll a                 | 619.54  | ***     | 1025.77 | ***     | 5330.73 | ***     | 1880.19     | ***     | 2727.00  | ***     | 86.85   | ***     | 62.512  | ***     | 56.54   | ***     | 112.49    | ***     |
| Chlorophyll b                 | 4622.45 | ***     | 1327.34 | ***     | 2388.66 | ***     | 13488.34    | ***     | 45789.36 | ***     | 1093.15 | ***     | 651.604 | ***     | 592.42  | ***     | 6070.35   | ***     |
| Carotenoids                   | 1698.06 | ***     | 496.92  | ***     | 396.71  | ***     | 1669.34     | ***     | 1905.97  | ***     | 186.99  | ***     | 219.169 | ***     | 149.60  | ***     | 382.55    | ***     |
| MDA                           | 417.67  | ***     | 365.52  | ***     | 159.49  | ***     | 165.33      | ***     | 737.101  | ***     | 0.09    | ns      | 0.435   | ns      | 6.04    | *       | 24.74     | ***     |
| H <sub>2</sub> O <sub>2</sub> | 1303.52 | ***     | 22.23   | ***     | 15.25   | ***     | 3940.56     | ***     | 7845.848 | ***     | 28.31   | ***     | 0.767   | ns      | 4.39    | *       | 88.92     | ***     |
| Total soluble sugar           | 13.42   | **      | 256.70  | ***     | 1.11    | ns      | 480.30      | ***     | 867.554  | ***     | 2.76    | ns      | 4.612   | *       | 45.48   | ***     | 26.39     | ***     |
| Protein content               | 192.53  | ***     | 168.89  | ***     | 1552.01 | ***     | 1505.33     | ***     | 113.911  | ***     | 7.10    | *       | 146.369 | ***     | 40.59   | ***     | 95.55     | ***     |
| PPO                           | 594.03  | ***     | 20.36   | ***     | 158.37  | ***     | 186.23      | ***     | 661.057  | ***     | 0.11    | ns      | 1.036   | ns      | 0.132   | ns      | 3.10      | ns      |
| POX                           | 756.72  | ***     | 16.17   | ***     | 28.47   | ***     | 1573.19     | ***     | 1161.83  | ***     | 22.72   | ***     | 49.578  | ***     | 96.88   | ***     | 177.85    | ***     |
| Protein fruit content         | 18.18   | ***     | 64.32   | ***     | 78.68   | ***     | 452.54      | ***     | 129.76   | ***     | 0.04    | ns      | 59.868  | ***     | 62.58   | ***     | 14.10     | ***     |
| Total soluble sugar fruit     | 65.24   | ***     | 1048.12 | ***     | 981.08  | ***     | 642.20      | ***     | 248.56   | ***     | 133.23  | ***     | 158.367 | ***     | 422.53  | ***     | 49.76     | ***     |
| Carotenoids fruit content     | 78.41   | ***     | 53.26   | ***     | 55.79   | ***     | 629.31      | ***     | 507.23   | ***     | 134.43  | ***     | 2.850   | ns      | 14.62   | ***     | 71.24     | ***     |
| Lycopene fruit content        | 1248.15 | ***     | 95.10   | ***     | 152.87  | ***     | 1547.54     | ***     | 512.77   | ***     | 75.37   | ***     | 64.732  | ***     | 36.81   | ***     | 137.53    | ***     |
| Polyphenols fruit content     | 285.44  | ***     | 43.22   | ***     | 331.35  | ***     | 0.06        | ns      | 6.25     | *       | 55.63   | ***     | 1.013   | ns      | 13.20   | **      | 41.44     | ***     |
| Flavonoids fruit content      | 23.52   | ***     | 363.72  | ***     | 3.92    | ns      | 8.68        | ns      | 135.57   | ***     | 524.61  | ***     | 31.849  | ***     | 128.29  | ***     | 49.62     | ***     |

ns: non significant, \*Significant at P < 0.05, \*\*significant at P < 0.005, \*\*\*significant at P < 0.001
